# Supplementary material
Source: publisher figshare collection journal article supplement (https://frontiersin.figshare.com/ndownloader/files/24169856)
Supplement: Supplementary file [file 24169856]

| Supplementary Table 1           |                                    |                              |                               |                                                                                                          |             |                                                                                             |                                                                   |
|---------------------------------|------------------------------------|------------------------------|-------------------------------|----------------------------------------------------------------------------------------------------------|-------------|---------------------------------------------------------------------------------------------|-------------------------------------------------------------------|
| Study                           | Helminth                           | Allograft model              | Live infection or product     | Parasite burden<br>Administration route<br>Time of administration<br>Life stage                          | Sample Size | Primary Outcome                                                                             | Secondary Measurement                                             |
| Helminth Genus: Echinococcus    |                                    |                              |                               |                                                                                                          |             |                                                                                             |                                                                   |
| Ai Erkien et al. (2012) (32)    | <i>Echinococcus multilocularis</i> | Rat heart                    | Live                          | 20% larval suspension<br>IP injection<br>Not defined<br>Larvae                                           | 12          | Graft survival; cessation of cardiac beating                                                | 1. Histopathology<br>2. Immunohistochemistry<br>3. Flow cytometry |
| Li et al. (2011) (36)           | <i>Echinococcus multilocularis</i> | Rat liver                    | Live                          | 20% larval suspension<br>IP injection<br>Not defined<br>Larvae                                           | 16          | Graft survival; necrosis                                                                    | 1. Histopathology<br>2. Flow cytometry<br>3. PCR<br>4. ELISA      |
| Helminth Genus: Schistosoma     |                                    |                              |                               |                                                                                                          |             |                                                                                             |                                                                   |
| Araujo et al. (1977) (24)       | <i>Schistosoma mansoni</i>         | Mouse skin                   | Live                          | 80 cercariae<br>IP injection<br>30 days prior<br>Cercariae                                               | 25          | Graft survival; bleeding and shrinking of graft and detachment of border noted as rejection | None                                                              |
| Dutta et al. (2010) (33)        | <i>Schistosoma mansoni</i>         | Mouse non-vascularised Heart | Product; recombinant protein  | 50µg Lacto- <i>N</i> -fucopentaose III SC injection<br>1 day prior and 4 days post-transplant<br>Product | 10          | Graft survival; cessation of cardiac beating                                                | 1. Flow cytometry                                                 |
|                                 | <i>Schistosoma mansoni</i>         | Mouse vascularised Heart     | Product; recombinant protein  | 50µg Lacto- <i>N</i> -fucopentaose III SC injection<br>1 day prior and 4 days post-transplant<br>Product | 5           | Graft survival; cessation of cardiac beating                                                | 1. Flow cytometry                                                 |
| Helminth Genus: Paragonimus     |                                    |                              |                               |                                                                                                          |             |                                                                                             |                                                                   |
| Hamajima et al. (1994) (29)     | <i>Paragonimus westermani</i>      | Mouse skin                   | Product; soluble worm extract | 30µg/ kg<br>IP injection<br>4 days prior<br>Neutral thiol protease (NTP) from larvae                     | 6           | Graft survival; rejection classified as 85% of more induration and no hair growth           | None                                                              |
| Helminth Genus: Nippostrongylus |                                    |                              |                               |                                                                                                          |             |                                                                                             |                                                                   |
| Ledingham et                    | <i>Nippostrongylus</i>             | Rat kidney                   | Live                          | 3500 larvae                                                                                              | Not         | Graft survival;                                                                             | 1. Histopathology                                                 |

|                              |                                         |             |                                            |                                                                               |         |                                                                              |                                                                                          |
|------------------------------|-----------------------------------------|-------------|--------------------------------------------|-------------------------------------------------------------------------------|---------|------------------------------------------------------------------------------|------------------------------------------------------------------------------------------|
| al. (1996) (35)              | <i>brasiliensis</i>                     |             |                                            | SC injection<br>4 days prior<br>Larval                                        | defined | increasing signs of<br>morbidity due to kidney<br>failure                    | 2. Immunohistochemistry<br>3. Flow cytometry                                             |
|                              | <i>Nippostrongylus<br/>brasiliensis</i> | Rat kidney  | Product;<br>soluble worm<br>extract        | 200 worm equivalents<br>SC injection<br>4 days prior<br>Extract               | 6       | Graft survival;<br>increasing signs of<br>morbidity due to kidney<br>failure | 1. Histopathology<br>2. Immunohistochemistry<br>3. Flow cytometry                        |
| Liwski et al.<br>(2000) (34) | <i>Nippostrongylus<br/>brasiliensis</i> | Mouse heart | Live                                       | 800 larvae<br>SC injection<br>4 days prior<br>Larval                          | 5       | Graft survival; heart<br>function                                            | 1. ELISA – cytokines<br>2. FACS<br>3. Intracellular IL-4<br>4. Cytotoxic T cell activity |
| Helminth Genus: Trichinella  |                                         |             |                                            |                                                                               |         |                                                                              |                                                                                          |
| Alkarmi et al.<br>(1995)(23) | <i>Trichinella<br/>spiralis</i>         | Mouse skin  | Live                                       | 300 larvae<br>Oral inoculation<br>3 days post-transplant<br>Larval            | 50      | Graft survival;<br>detachment of graft                                       | None                                                                                     |
|                              | <i>Trichinella<br/>pseudospiralis</i>   | Mouse skin  | Live                                       | 300 larvae<br>Oral inoculation<br>3 days post-transplant<br>Larval            | 50      | Graft survival;<br>detachment of graft                                       | None                                                                                     |
|                              | <i>Trichinella<br/>spiralis</i>         | Mouse skin  | Product;<br>soluble worm<br>extract        | 50µg<br>IP injection<br>Various days post-<br>transplant<br>Extract           | 10      | Graft survival;<br>detachment of graft                                       | None                                                                                     |
|                              | <i>Trichinella<br/>pseudospiralis</i>   | Mouse skin  | Product;<br>soluble worm<br>extract        | 50µg<br>IP injection<br>Various days post-<br>transplant<br>Extract           | 10      | Graft survival;<br>detachment of graft                                       | None                                                                                     |
|                              | <i>Trichinella<br/>spiralis</i>         | Mouse skin  | Product; native<br>secretions<br>from worm | 50µg<br>IP injection<br>Various days post-<br>transplant<br>Native secretions | 10      | Graft survival;<br>detachment of graft                                       | None                                                                                     |
|                              | <i>Trichinella<br/>pseudospiralis</i>   | Mouse skin  | Product; native<br>secretions<br>from worm | 50µg<br>IP injection<br>Various days post-<br>transplant<br>Native secretions | 10      | Graft survival;<br>detachment of graft                                       | None                                                                                     |

|                                           |                             |             |                                     |                                                                                                |     |                                                                                                                                                                                            |                                                                  |
|-------------------------------------------|-----------------------------|-------------|-------------------------------------|------------------------------------------------------------------------------------------------|-----|--------------------------------------------------------------------------------------------------------------------------------------------------------------------------------------------|------------------------------------------------------------------|
| Barriga et al.<br>(1978) (25)             | <i>Trichinella spiralis</i> | Mouse skin  | Live                                | 45 larvae<br>Oral inoculation<br>29 days prior<br>Larval                                       | 4   | Graft survival;<br>1x – mild inflammation<br>2x – intense inflammation<br>3x – necrosis<br>4x – sloughing                                                                                  | None                                                             |
|                                           | <i>Trichinella spiralis</i> | Mouse skin  | Product;<br>soluble worm<br>extract | 0.2mg TsE protein<br>IP injection<br>29 days prior<br>Product                                  | 4   | Graft survival;<br>1x – mild inflammation<br>2x – intense inflammation<br>3x – necrosis<br>4x – sloughing                                                                                  | None                                                             |
| Chernyakhovs<br>kaya et al<br>(1972) (26) | <i>Trichinella spiralis</i> | Mouse skin  | Live                                | 70-90 larvae<br>Oral Inoculation<br>27 days prior<br>Larval                                    | N/A | Graft survival; rejection<br>noted as oedema and<br>haemorrhages on the<br>surface of the graft.<br>Complete necrosis noted<br>as destruction of graft<br>epithelium and<br>appearing scar | None                                                             |
| Chimyshkyan<br>et al. (1976)<br>(27)      | <i>Trichinella spiralis</i> | Mouse skin  | Live                                | 70-90 larvae<br>Oral Inoculation<br>Not defined<br>Larval                                      | N/A | Graft survival; necrosis                                                                                                                                                                   | None                                                             |
| Deng et al.<br>(2016) (37)                | <i>Trichinella spiralis</i> | Mouse heart | Live                                | 300 larvae<br>Oral Inoculation<br>28 days prior<br>Larval                                      | 5   | Graft survival; rejection<br>classified as cessation of<br>cardiac beating                                                                                                                 | 1. Histopathology<br>2. Flow cytometry<br>3. Luminex - cytokines |
|                                           | <i>Trichinella spiralis</i> | Mouse skin  | Live                                | 300 larvae<br>Oral Inoculation<br>28 days prior<br>Larval                                      | 5   | Graft survival; rejection<br>defined as >80 %<br>necrosis of the<br>transplanted skin<br>surface as well as the<br>appearance of<br>desiccation and<br>shrinkage.                          | 1. Histopathology<br>2. Flow cytometry<br>3. Luminex - cytokines |
| Faubert et al.<br>(1975) (28)             | <i>Trichinella spiralis</i> | Mouse skin  | Live                                | Serum from mice infected<br>with 100 larvae<br>Oral inoculation<br>Up to 3 days prior<br>Serum | 10  | Graft survival; oedema,<br>necrosis                                                                                                                                                        | None                                                             |

|                                          |                                   |            |                                     |                                                                                   |    |                                                      |      |
|------------------------------------------|-----------------------------------|------------|-------------------------------------|-----------------------------------------------------------------------------------|----|------------------------------------------------------|------|
|                                          | <i>Trichinella spiralis</i>       | Mouse skin | Live                                | 500 larvae<br>Oral inoculation<br>30 days prior<br>Larval                         | 15 | Graft survival; oedema,<br>necrosis                  | None |
| Svet-<br>Moldavsky et<br>al. (1969) (30) | <i>Trichinella spiralis</i>       | Mouse skin | Live                                | 75-85 larvae<br>Unclear<br>23 days prior<br>Larval                                | 9  | Graft survival; oedema,<br>necrosis                  | None |
|                                          | <i>Trichinella spiralis</i>       | Mouse skin | Live                                | 75-85 larvae<br>Unclear<br>7 days prior<br>Larval                                 | 8  | Graft survival; necrosis                             | None |
| Szkudlinski et<br>al. (1997) (31)        | <i>Trichinella spiralis</i>       | Mouse skin | Live                                | 80-100 larvae<br>IP injection<br>23 days prior<br>Larval                          | 12 | Graft survival;<br>percentage of area of<br>necrosis | None |
|                                          | <i>Trichinella pseudospiralis</i> | Mouse skin | Live                                | 80-100 larvae<br>IP injection<br>23 days prior<br>Larval                          | 12 | Graft survival;<br>percentage of area of<br>necrosis | None |
|                                          | <i>Trichinella spiralis</i>       | Mouse skin | Product;<br>soluble worm<br>extract | Extract isolated from<br>100mg larvae<br>SC injection<br>23 days prior<br>Product | 12 | Graft survival;<br>percentage of area of<br>necrosis | None |
|                                          | <i>Trichinella pseudospiralis</i> | Mouse skin | Product;<br>soluble worm<br>extract | Extract isolated from<br>100mg larvae<br>SC injection<br>23 days prior<br>Product | 12 | Graft survival;<br>percentage of area of<br>necrosis | None |
